# Supplementary material for: A simple and rapid analytical methodology based on liquid chromatography-tandem mass spectrometry for monitoring pesticide residues in soils from Argentina
Source: Royal Society of Chemistry journal article supplement (doi:10.1039/c5ay01582k), 2015-01-01
Supplement: c5ay01582k1.pdf [file c5ay01582k1.pdf]

**SUPPLEMENTARY INFORMATION**

**Simple and rapid analytical methodology based on liquid chromatography-tandem mass spectrometry  
for monitoring pesticide residues in soils from Argentina**

Eduardo De Gerónimo<sup>1\*</sup>, Ana María Botero-Coy<sup>2</sup>, José M. Marín<sup>2</sup>, Virginia C. Aparicio<sup>1</sup>, José L. Costa<sup>1</sup>,  
Juan V. Sancho<sup>2</sup>, Félix Hernández<sup>\*2</sup>

<sup>1</sup>Instituto Nacional de Tecnología Agropecuaria (INTA), Estación Experimental Agropecuaria Balcarce, Route 226 Km 73,5 (7620),  
Balcarce, Buenos Aires, Argentina.

<sup>2</sup> Research Institute for Pesticides and Water, University Jaume I, 12071 Castellon, Spain

**S.I. Table 1. Physico-chemical properties of the model soils used in this study, collected from different areas of Argentina**

| Nº Lab. | EEA INTA       | Nº | C.E.C.<br>Cmol/kg (2) | Sand | Silt<br>(%) (1) | Clay | (OM) (3) | pH (3) |
|---------|----------------|----|-----------------------|------|-----------------|------|----------|--------|
| 66298   | Marco Juarez   | 1  | 32.9                  | 12.9 | 53.4            | 33.7 | 4.7      | 6.4    |
| 66279   | Sgo del Estero | 2  | 19.9                  | 21.3 | 54.9            | 23.8 | 4.5      | 7.3    |
| 66282   | Famailla       | 3  | 38.3                  | 8.5  | 57.1            | 34.4 | 8.5      | 6.5    |
| 66283   | Pergamino      | 4  | 16.5                  | 19.9 | 53.5            | 26.6 | 2.7      | 6.1    |
| 66512   | Cerro Azul     | 5  | 27.3                  | 5.7  | 24.8            | 69.5 | 6.0      | 5.7    |
| 63727   | Balcarce       | 6  | 37.4                  | 43.8 | 26.9            | 29.3 | 10.3     | 6.3    |
| 66514   | Alto Valle     | 7  | 26.2                  | 43.1 | 35.6            | 21.2 | 2.7      | 7.5    |
| 66515   | Corrientes     | 8  | 9.0                   | 90.3 | 3.3             | 6.4  | 0.5      | 6.0    |
| 67685   | Chaco          | 9  | 23.5                  | 13.5 | 49.0            | 37.5 | 4.0      | 6.7    |
| 67916   | Reconquista    | 10 | 19.0                  | 24.9 | 50.4            | 24.7 | 5.1      | 6.0    |
| 66295   | Cerro amigo    | 11 | 30.0                  | 38.1 | 32.5            | 29.4 | 6.9      | 6.4    |
| 67775   | Barrow         | 12 | 40.5                  | 29.7 | 33.2            | 37.1 | 7.3      | 6.9    |

OM: organic matter

CEC: cation exchange capacity

(1) Gee, G.W., Bauder, J.W., 1986. Particle size analysis. In: Methods of Soil Analysis. Part 1. Methods Phys. Minerol. Second Edi.

(2) Chapman, H.D., 1965. Cation exchange capacity. In: Methods of Soils Analysis. Am. Soc. Agron. Second Ed., 891 – 901.

(3) Nelson, D.W., Sommers, L.E., 1982. Total carbon, organic carbon and organic matter. Am. Soc. Agron. 9, 539 – 579.

S.I. Table 2. Pesticide concentrations (mg/kg) in the soils analyzed

| Soil \ Compound      | Cerro Azul | Alto Valle | S del Estero | Corrientes | Cerro Amigo | Pergamino   | Reconquista | Barow       |
|----------------------|------------|------------|--------------|------------|-------------|-------------|-------------|-------------|
| Chlorpyrifos (CHLOR) | 0.02*      |            |              | 0.004*     |             |             |             |             |
| Imidacloprid (IMI)   |            |            |              |            |             | 0.02*       |             | <b>0.07</b> |
| Dimethoate (DIM)     |            |            |              |            |             | 0.03*       | <b>0.06</b> |             |
| Ametryn (AME)        |            |            | 0.03*        |            |             | <b>0.09</b> |             |             |
| Atrazine (ATZ)       |            | 0.02*      |              |            | 0.01*       |             | <b>0.06</b> | <b>0.07</b> |

\*: estimated concentration from a response that was above S/N=10 (but below the LOQ objective of 0.05 mg/kg).

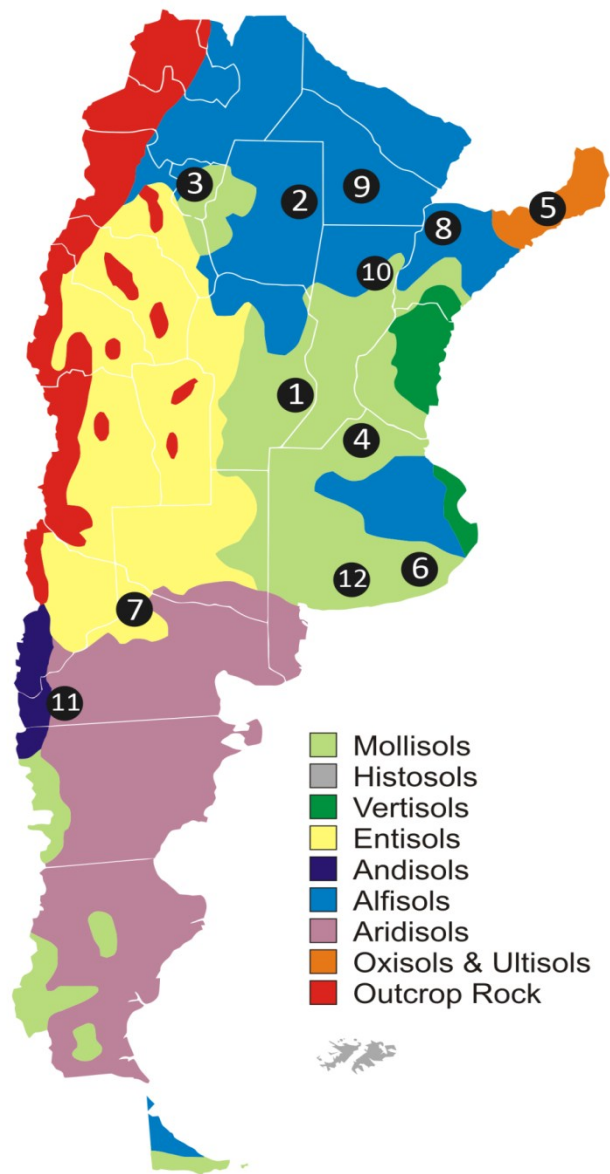

| Name of Soil   | Zone |
|----------------|------|
| Marco Juarez   | 1    |
| Sgo del Estero | 2    |
| Famailá        | 3    |
| Pergamino      | 4    |
| Cerro Azul     | 5    |
| Balcarce       | 6    |
| Alto Valle     | 7    |
| Corrientes     | 8    |
| Chaco          | 9    |
| Reconquista    | 10   |
| Cerro amigo    | 11   |
| Barrow         | 12   |

- Mollisols
- Histosols
- Vertisols
- Entisols
- Andisols
- Alfisols
- Aridisols
- Oxisols & Ultisols
- Outcrop Rock

S.I. Figure 1. Location of areas where soil samples were collected

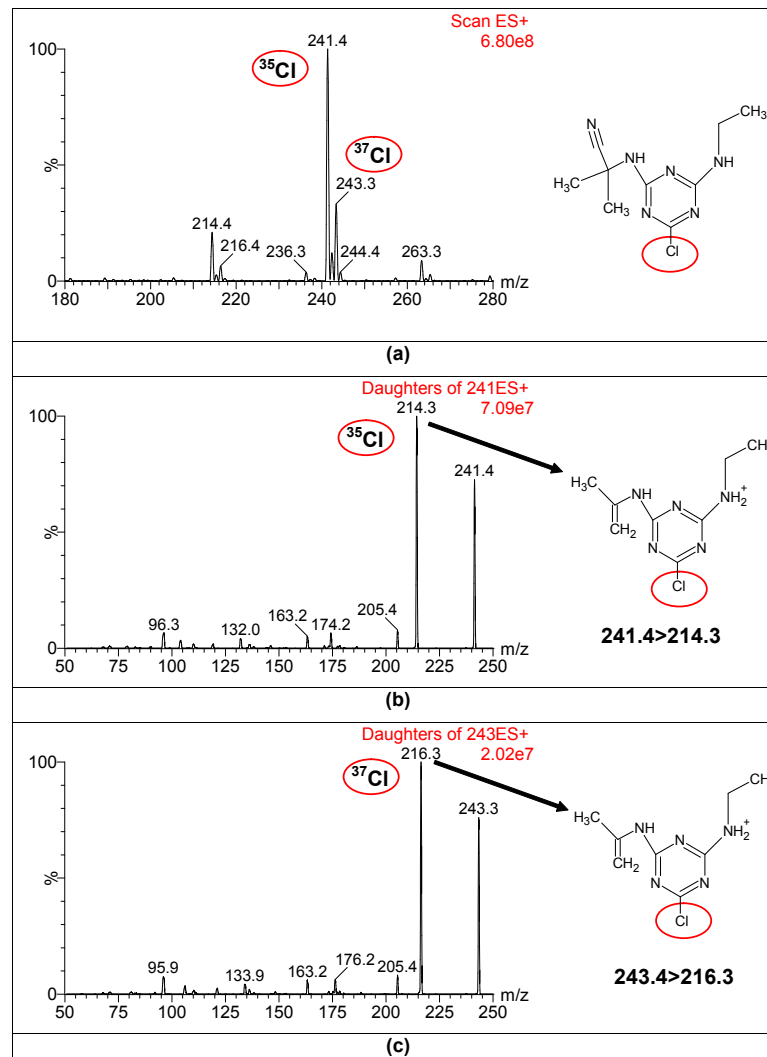

**S.I. Figure 2.** Example of the use of the chlorine isotopic pattern to obtain MRM transitions. (a) Cyanazine MS spectrum acquired at a cone voltage of 30 V; (b) Cyanazine MS/MS spectrum for precursor ion m/z 241 and (c) for precursor ion m/z 243 both at a collision energy of 15 eV.

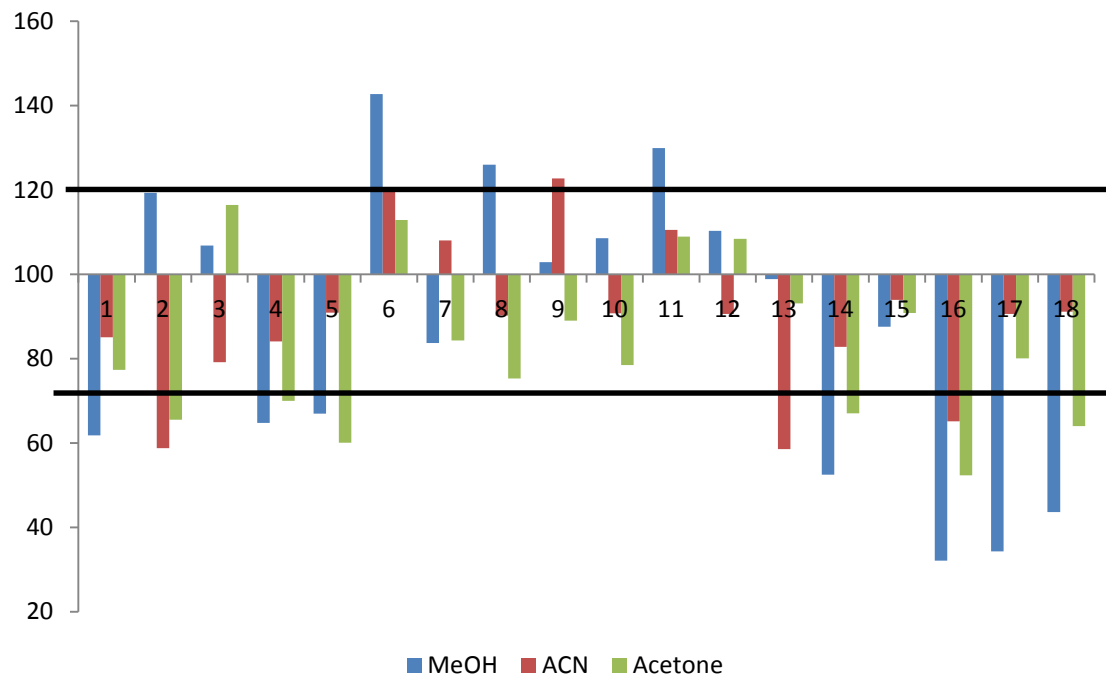

**S.I. Figure 3. Matrix effects for different extraction systems (dilution x 2) (50 µg/L in soil extract). The name of pesticides corresponding to the different numbers can be found in Table 1**

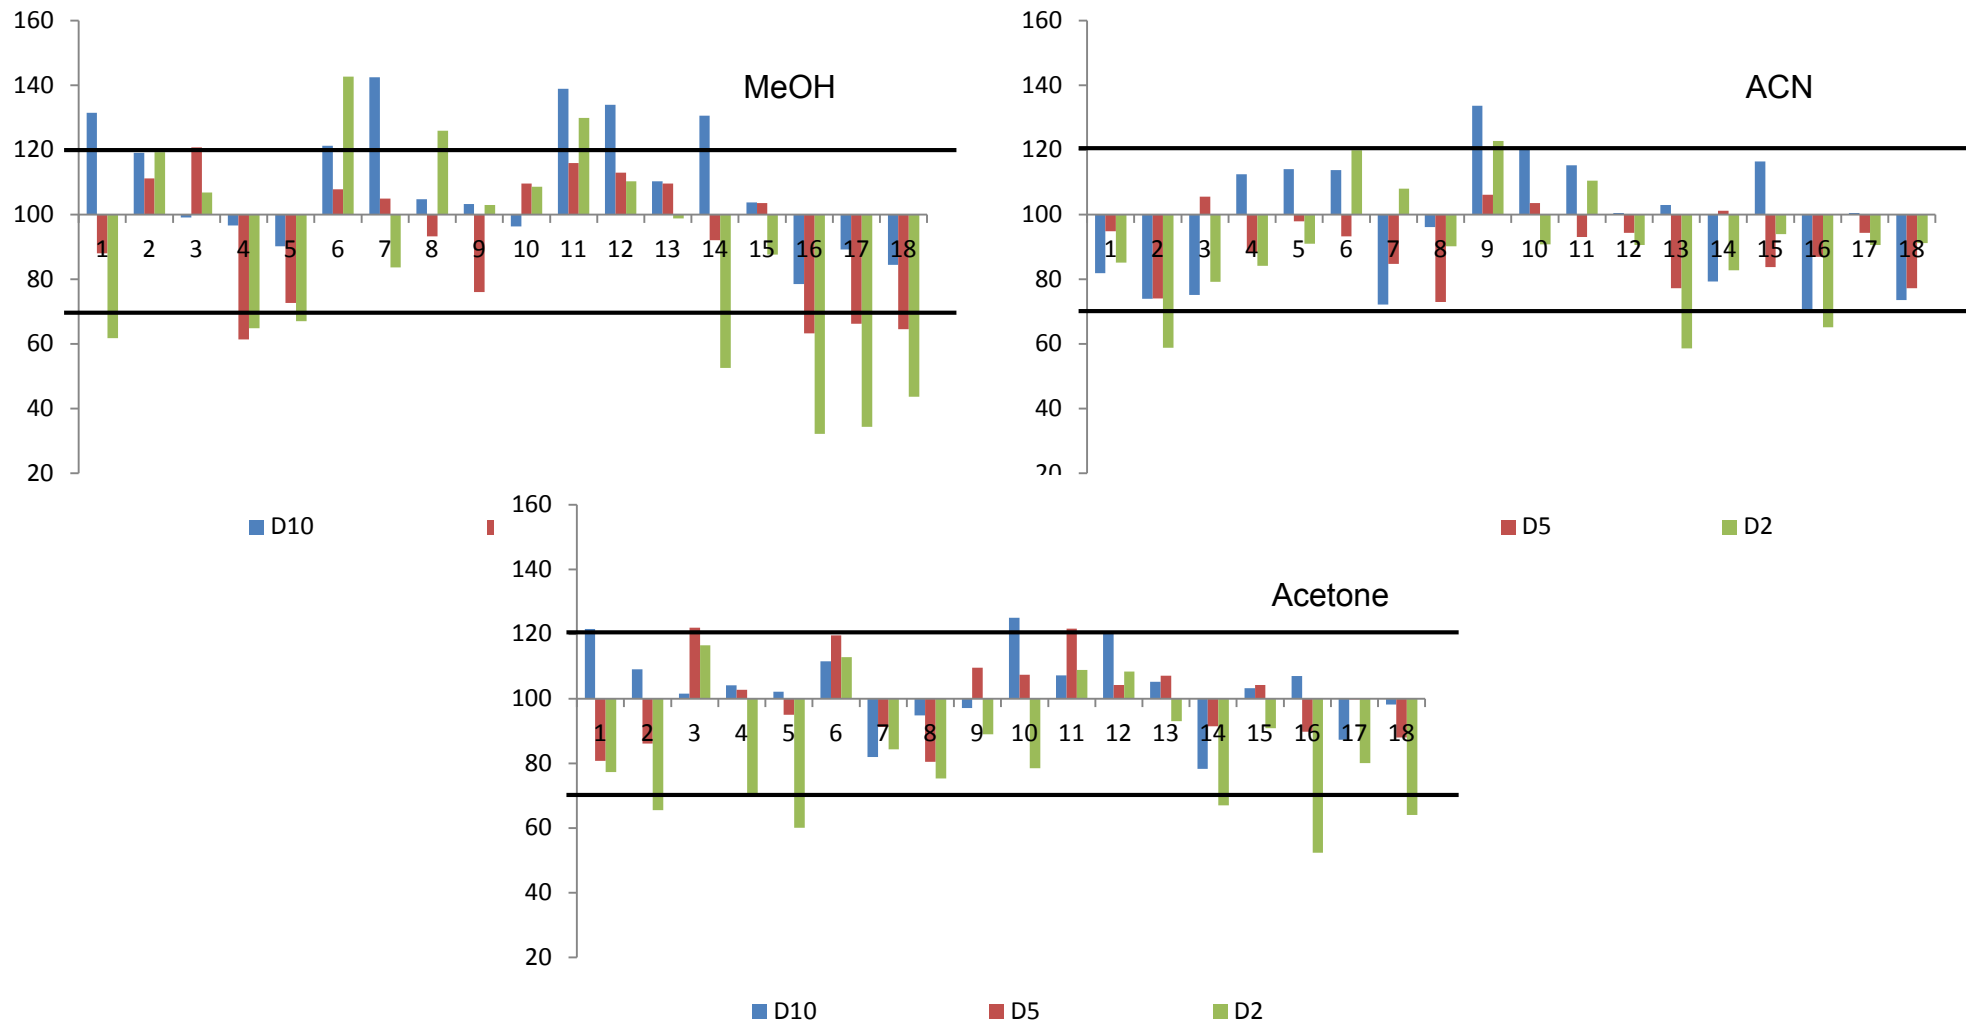

**S.I. Figure 4. Matrix effects for the extraction systems tested, after diluting soil sample extracts with water. The name of pesticides corresponding to the different numbers can be found in Table 1**

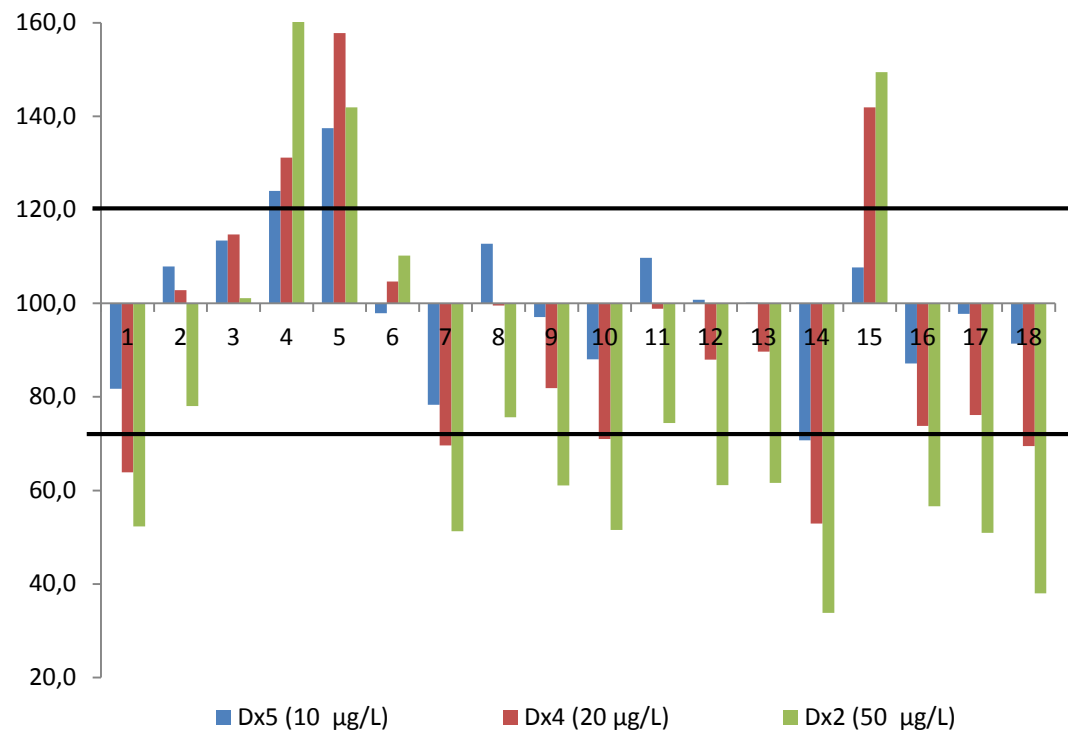

**S.I. Figure 5. Matrix effects after application of QuEChERS and subsequent dilution of the soil extract with water. The name of pesticides corresponding to the different numbers can be found in Table 1**
